# Supplementary material
Source: publisher figshare collection journal article supplement (https://gsajournals.figshare.com/ndownloader/files/14349401)
Supplement: Supplementary file 1 [file 14349401]

## Sheet: Results Summary
TABLE S2. Number of Excretory Canals Tested for Short Phenotypes During Subsequent RNAi Tests
Gene	C. elegans Wormbase Sequence #	Bacterial Clone	# Canals Examined	Average Canal Length (4=wt)	Standard Dev.	# Short Canals	Average Short Canal Length	% Short Canals
best-3	C01B12.3	II-1A07	36	3.84	0.31	10	3.41	0.278
ceh-37	C37E2.5	X-6L05	40	3.8	0.34	12	3.33	0.3
ceh-6	K02B12.1	I-4M15	33	1.14	0.49	33	1.14	1
cyk-1	F11H8.4	III-3P11	77	3.29	0.46	59	3.07627	0.766
dhhc-2	Y47H9C.2	I-10A19	57	3.9	0.21	12	3.54	0.211
egal-1	C10G6.1	IV-3A19	40	1.05	0.37	40	1.05	1
exc-10	T25C8.1	III-6D06	63	3.52	0.46	43	3.29	0.683
exc-11	F41E7.1	X-5E01	34	1.79412	0.64	33	1.73	0.971
exc-12	T05D4.3	III-6B22	53	2.91	0.77	42	2.62	0.792
exc-13	C03G6.5	V-16K12	75	3.9	0.24	15	3.5	0.204
exc-14	K11D12.9	V-14L15	36	1.44	0.47	36	1.44	1
exc-15	T08H10.1	V-3B06	41	3.85	0.26	11	3.45	0.27
fbxa-183	F44E7.6	V-4M12	125	3.42	0.47	83	3.12	0.664
gck-3	Y59A8B.23	V-11L08	31	3.48	0.31	28	3.43	0.903
gck-3	Y59A8B.23	V-11L10	45	3.84	0.26	15	3.53	0.333
gck-3 combined	2 clones	combined	76	3.7	0.33	43	3.47	0.57
gsr-1	C46F11.2	III-1H04	73	3.97	0.14	4	3.43	0.0548
gst-28	Y53F4B.31	II-9O06	26	3.84	0.33	7	3.39	0.269
inx-12	ZK770.3	I-1H15	46	2.76	0.56	44	2.7	0.957
inx-13	Y8G1A.2	I-1H11	50	3.01	0.67	40	2.76	0.8
mop25.2	Y53C12A.4	II-6N22	20	1.13	0.22	20	1.13	1
mxt-1	Y18D10A.8	I-6D19	59	2.65	0.61	55	2.55	0.9327
vha-5	F35H10.4	IV-4O13	78	3.13	0.94	46	2.52	0.59
All clones showed canal defects in at least 5 animals during 1st RNAi test. Column H shows average length of canals in animals showing effects of RNAi (i.e. excepting animals with full-length narrow canals as not being affectd by the RNAi)

## Sheet: Data-RNAi
Gene	Strain N2	best-3	ceh-37	ceh-6	cyk-1	dhhc-2	egal-1	exc-10	exc-11	exc-12	exc-13	exc-14	exc-15	fbxa-183	gck-3	gck-3	gck-3	gsr-1	gst-28	inx-12	inx-13	mop25.2	mxt-1	vha-5	C09F12.3	H09G03.1	T19D12.9
C. elegans clone	wild-type	C01B12.3	C37E2.5	K02B12.1	F11H8.4	Y47H9C.2	C10G6.1	T25C8.1	F41E7.1	T05D4.3	C03G6.5	K11D12.9	T08H10.1	F44E7.6	Y59A8B.23	Y59A8B.23	2 clones	C46F11.2	Y53F4B.31	ZK770.3	Y8G1A.2	Y53C12A.4	Y18D10A.8	F35H10.4	C09F12.3	H09G03.1	T19D12.9
Bact.Clone		II-1A07	X-6L05	I-4M15	III-3P11	I-10A19	IV-3A19	III-6D06	X-5E01	III-6B22	V-16K12	V-14L15	V-3B06	V-4M12	V-11L08	V-11L10	combined	III-1H04	II-9O06	I-1H15	I-1H11	II-6N22	I-6D19	IV-4O13	X-8B03	III-1P09	II-5K13
# Canals Observed	100	36	40	33	77	57	40	63	34	53	75	36	41	125	31	45	76	73	26	46	50	20	59	78	88	179	83
Average Length	4	3.83611	3.8	1.13636	3.29221	3.90351	1.05	3.51587	1.79412	2.90566	3.9	1.44444	3.85366	3.4184	3.48387	3.84444	3.69737	3.96849	3.83654	2.76087	3.01	1.125	2.65254	3.12821	3.94091	3.93575	3.90476
Std.Dev.	0	0.30998	0.349908	0.488504	0.461339	0.209987	0.372104	0.464187	0.640994	0.772462	0.2361	0.47476	0.256025	0.470995	0.309135	0.262683	0.332455	0.145179	0.331227	0.555169	0.67378	0.222131	0.61064	0.949832	0.220572	0.238984	0.201187
# Short Canals	0	10	12	33	59	12	40	43	33	42	15	36	11	83	28	15	43	4	7	44	40	20	55	46	7	18	16
% Short Canals	0	0.28	0.3	1	0.77	0.21	1	0.68	0.97	0.79	0.2	1	0.27	0.66	0.9	0.33	0.57	0.0547	0.27	0.96	0.8	1	0.93	0.59	0.0795	0.1	0.19
Average Short-Canal Length	-	3.41	3.33	1.14	3.08	3.54	1.05	3.29	1.73	2.62	3.5	1.44	3.45	3.12	3.43	3.53	3.47	3.43	3.39	2.7	2.76	1.13	2.55	2.52	3.26	3.36	3.25
Std.Dev.Short-Canal Length	-	0.31	0.31	0.35	0.28	0.21	0.37	0.39	0.52	0.59	0.28	0.47	0.15	0.27	0.27	0.25	0.26	0.3	0.38	0.5	0.51	0.22	0.51	0.79	0.34	0.46	0
# Canals <=1.0 Length	0	0	0	21	0	0	37	0	7	1	0	15	0	0	0	0	0	0	0	0	0	15	0	3	0	0	0
# Canals 1.5-3.8 Length	0	10	12	12	59	12	3	43	26	41	15	21	11	83	28	15	43	4	7	44	40	5	55	43	7	18	16
# Full-length canals (>=+3.9)	100	26	28	0	18	45	0	20	1	11	60	0	30	42	3	30	33	69	19	2	10	0	4	32	81	161	67
TOTAL # SHORT CANALS	0	10	12	33	59	12	40	43	33	42	15	36	11	83	28	15	43	4	7	44	40	20	55	46	7	18	16
Total % short canals	0	0.277778	0.3	1	0.766234	0.210526	1	0.68254	0.970588	0.792453	0.2	1	0.268293	0.664	0.903226	0.333333	0.565789	0.0547945	0.269231	0.956522	0.8	1	0.932203	0.589744	0.0795455	0.100559	0.192771
p-value (3x2 Fisher's exact test) for knock-down + million mutation animals	-	5.80x10-7	7.67x10-8	6.69x10-24	2.82x10-34	2.32x10-6	5.66x10-36	2.72x10-24	1.40x10-30	9.41x10-28	1.25X10-6	9.49x10-34	4.30X10-7	2.97x10-30	1.60x10-25	3.62x10-9	1.63x10-20	3.0x10-2	7.79x10-6	2.24x10-35	3.27x10-29	3.39x10-23	2.02x10-38	7.72x10-22	4.32X10-3	4.69X10-4	1.34x10-6
Data - kd animals	4	3.8	3	1.5	3	4	1	4	2	3	4	1	4	4	3	3.5	3.5	4	4	3	2	1.5	2	2	3	4	3.5
	4	4	4	1.5	3	4	1	3.5	2	3.5	3.75	1.5	4	4	3	3.75	3.75	4	4	3	3	1.5	2	2.5	4	4	3.5
Underlining delineates	4	4	4	1.5	3	4	1	3.5	2	4	4	2	4	4	3	4	4	4	4	2	4	1	2	4	4	4	4
observations made on	4	3.8	4	1	3	4	1	3.5	2.5	3	4	2	4	3.5	3.5	4	4	3.7	4	3	4	1.5	2.5	4	4	4	4
different days/sets of animals	4	3.5	4	1	3	4	1	3.5	1	4	4	2	4	4	3.75	4	4	4	4	3.5	3	1.5	2	4	4	4	4
	4	4	4	0.5	3	4	3	3.5	1	4	4	2	4	4	3.5	4	4	4	3.75	3.5	2	1	2	4	4	4	4
	4	4	4	1.5	4	3.5	1	4	2	1.5	4	1	3	4	3.5	4	4	4	4	4	2	1	2	3	4	4	4
	4	4	4	1.5	4	3.5	1	4	2	3	3.75	1	4	4	3.5	4	4	4	4	3	3	1	2	3	4	4	4
	4	4	4	1.5	3	4	1	3.5	2	3	3	2.5	4	4	3.5	4	4	4	4	3	3	1	3	2	3	4	4
	4	4	4	3	3	4	1	4	2	3	4	1.5	4	4	3.5	4	4	4	3	3	2.5	1.5	4	1.5	3	3	4
	4	4	4	1.5	3	4	1	3.5	1	4	4	2	4	4	3.5	4	4	4	4	2.5	3	1	2.5	2	3	4	4
	4	4	4	1	2.5	4	1	4	1	3	4	1	4	3.8	4	3.5	3.5	4	4	2	3	1	2.5	1.5	4	4	4
	4	4	3	0.5	2.5	4	1.5	4	2.5	3.5	3	1	4	4	4	3.5	3.5	4	4	2	3	1	1.5	4	4	4	2
	4	4	4	0.5	3	4	1	3.5	2	3	4	1	4	4	3.5	3.5	3.5	4	3.75	2.5	3.5	1	2	4	4	4	4
	4	4	4	1	3	4	1	3.5	2	3	4	1.5	3.5	4	3.5	4	4	4	4	2	4	1	4	3.75	4	4	4
	4	4	4	1.5	3.5	4	1	4	1.5	2.5	4	1	4	4	3.75	4	4	4	4	2	4	1	4	3.75	3.5	4	4
	4	4	4	1.5	4	4	1	3	1.5	2	4	1	3.5	4	3.75	4	4	4	4	2	3	1	2	4	4	4	4
	4	3	4	0.5	2	4	1	3.5	1.5	4	3.75	1.5	3.5	4	3	4	4	4	3	3	3	1	2	4	4	4	4
	4	4	3	0.5	4	4	1	3.5	2.5	4	4	1.5	4	4	3.5	3	3	4	3	2	2.5	1	3	3.5	4	4	4
	4	3	4	1	3.5	3.5	1	3.5	1.5	3.5	4	1	4	3	3.5	4	4	4	3.5	4	3	1	3.5	3.5	4	4	3.5
	4	4	4	0.5	3	3.75	1	3.5	2	2	4	1	4	4	3.5	4	4	4	4	3	3		4	4	4	4	3.75
	4	3	3.5	1	4	3	1	4	2	2	4	2	4	3	3.75	4	4	4	4	2.5	3		3	4	4	4	4
	4	3.5	4	1	4	4	1.5	3.5	1.5	2.5	4	2	4	3	4	4	4	4	4	3	4		3	4	4	4	4
	4	4	4	1	4	4	1	4	2	2.5	4	1.5	4	3.5	3.75	3.75	3.75	4	3.75	3	4		3	4	4	4	4
	4	3.5	3	1	4	4	1	4	1.5	4	4	1	4	3	3.5	3.75	3.75	4	4	2	4		2.5	4	4	4	4
	4	4	4	1.5	4	3.75	1	4	1.5	4	4	0.5	4	3.5	3	4	4	4	4	2.5	3.5		2.5	4	4	4	4
	4	4	3.5	1	3.5	4	1	3	4	2	4	1	4	4	3.5	3.75	3.75	3.5		2	2		3	4	4	4	4
	4	4	4	1	3	4	1	3.5	3	2.5	4	1		4	3	4	4	4		2	4		3	4	4	4	4
	4	4	3.75	1.5	3	3.5	1	3.5	1	3	4	1.5		4	3.75	4	4	4		2.5	3		2	4	4	4	4
	4	4	4	1	3	4	1	3	1.5	3.5	4	1.5		3	3	4	4	4		3	3		2.5	4	4	4	4
	4	4	3.5	1	4	4	1	3	1	4	4	2		4	3.5	4	4	4		3	3.5		2	4	4	4	4
	4	3.5	3.5	1	3.5	4	0	4	1	4	3.5	1.5		3		3.5	3.5	4		2.5	3.5		2	4	4	4	4
	4	4	4	1	3	3.75	1	3	2	2.5	3.75	2		3		3	3	4		3	2.5		2	4	4	2	4
	4	4	4		3	4	1	3.5	1.5	3	4	2		3		3.75	3.75	4		3	3.5		3	4	4	4	4
	4	4	3.5		3	4	1	3.5		2	4	1		3.5		4	4	4		2.5	2		2.5	1.5	4	4	4
	4	3.5	4		3.5	4	1	4		3	4	1.5		4		4	4	4		2.5	3		3	1.5	4	4	4
	4		3		3.5	4	1	3.75		3	4			3		4	4	3		3.5	3		3	4	4	4	4
	4		4		3.5	4	1	3.75		3.5	4			3.5		4	4	4		3.5	2		3	4	4	4	4
	4		4		3	4	1	3		3	4			3		4	4	4		3	3.5		3.5	1.5	4	4	4
	4		3.75		3.5	4	1	3.5		4	4			3		3.75	3.75	4		3	3		2.5	1.5	4	4	4
	4				3	3.75		3.5		2	4			3		4	4	4		3.5	2		3	2	4	4	4
	4				3	4		4		2	4			3		4	4	4		2	3		2	2	4	4	3.75
	4				3	4		3		2	3.5			3		4	4	3.5		2.5	2.5		2	3	4	4	4
	4				3	4		3.5		2.5	4			4		3.5	3.5	4		3	2.5		3.5	3	4	4	4
	4				3.5	4		4		2.5	4			4		3.5	3.5	4		3	2		2.5	1.75	4	4	4
	4				3	4		4		2	4			3			3	4		3	2.5		3	1.75	4	4	4
	4				3	3.5		4		2	4			3			3	4			2.5		3	4	4	4	4
	4				3	3.5		4		3	3.75			3.5			3	4			4		3.5	4	4	4	4
	4				3	3.5		3.5		2	3			4			3.5	4			4		2.5	1	4	4	4
	4				3	4		3		2.5	4			4			3.75	4			2		3	2.5	4	4	4
	4				3.5	4		3		3	3.75			3			3.5	4					2	3	4	4	3
	4				4	4		3.5		3	4			3			3.5	4					2	3	4	4	3
	4				4	4		3		1	4			3			3.5	4					2.5	3	4	4	4
	4				3	4		3			4			3			3.5	4					2.5	3	4	4	4
	4				3	4		3.5						4			3.5	4					3	2	4	4	3
	4				3	4		3						4			3.5	4					2.5	2	3.8	4	3.5
	4				3	4		4						3			4	4					3	1	4	3	4
	4				4			3.5						3			4	4					2.5	1	4	4	4
	4				3			4						3			3.5	4					3	4	4	4	2.5
	4				3			1.5						3			3.5	4						4	4	4	3
	4				4			2.5						3			3.75	4						4	4	4	4
	4				4			3						3			3.75	4						4	4	4	4
	4				3.5			3.5						4			3	4						3	4	4
	4				3.5									4			3.5	4						2.5	4	4
	4				3									4			3.5	4						3	3.5	4
	4				3									3			3.5	4						3.5	4	4
	4				3									3			3.75	4						3	4	4
	4				4									2.5			4	4						3	4	4
	4				3									3.5			3.75	4						3	4	4
	4				3									3.5			3.5	4						3	4	4
	4				4									3.5			3	4						3	4	4
	4				4									3.5			3.5	4						3	4	4
	4				3									4			3	4						3	4	4
	4				3									3.5			3.75							3.5	4	4
	4				3									3.5			3							4	4	4
	4				3									3			3.5							4	4	4
	4				3.5									3										3.5	4	4
	4													4										3	4	4
	4													3.5											4	3.5
	4													3.5											4	3.5
	4													3.5											4	4
	4													3											4	4
	4													3											4	4
	4													4											4	4
	4													3.5											4	3.75
	4													3											4	4
	4													3.5											4	4
	4													3.5											4	4
	4													3												4
	4													3.5												4
	4													3.5												3.75
	4													3.5												4
	4													2.5												4
	4													3												4
	4													2.5												4
	4													3												4
	4													3												4
	4													4												4
	4													3												4
	4													3												4
														3												4
														3												4
														2.5												4
														3												4
														3												4
														3												4
														3												4
														3												4
														3												4
														4												4
														4												4
														4												4
														4												4
														3												4
														4												4
														3												4
														3												4
														3												4
														3												4
														3												4
														4												3.5
														3												4
														3												4
														3.5												4
														3.5												4
																										4
																										4
																										4
																										4
																										4
																										4
																										4
																										3.5
																										4

## Sheet: Graph-RNAi Data
Gene	wild-type	best-3	ceh-37	ceh-6	cyk-1	dhhc-2	egal-1	exc-10	exc-11	exc-12	exc-13	exc-14	exc-15	fbxa-183	gck-3	gck-3	gck-3	gsr-1	gst-28	inx-12	inx-13	mop25.2	mxt-1	vha-5	C09F12.3	H09G03.1	T19D12.9
# Canals Observed	100	36	40	33	77	57	40	63	34	53	75	36	41	125	31	45	76	73	26	46	50	20	59	78	88	179	83
Average Length	4	3.83611	3.8	1.13636	3.29221	3.90351	1.05	3.51587	1.79412	2.90566	3.9	1.44444	3.85366	3.4184	3.48387	3.84444	3.69737	3.96849	3.83654	2.76087	3.01	1.125	2.65254	3.12821	3.94091	3.93575	3.90476
Std.Dev.	0	0.30998	0.349908	0.488504	0.461339	0.209987	0.372104	0.464187	0.640994	0.772462	0.2361	0.47476	0.256025	0.470995	0.309135	0.262683	0.332455	0.145179	0.331227	0.555169	0.67378	0.222131	0.61064	0.949832	0.220572	0.238984	0.201187
# Canals <=1.0 Length	0	0	0	21	0	0	37	0	7	1	0	15	0	0	0	0	0	0	0	0	0	15	0	3	0	0	0
% very short canals	0	0	0	0.636	0	0	0.925	0	0.206	0.0189	0	0.417	0	0	0	0	0	0	0	0	0	0.75	0	0.03846	0	0	0
# Canals 1.5-3.8 Length	0	10	12	12	59	12	3	43	26	41	15	21	11	83	28	15	43	4	7	44	40	5	55	43	7	18	16
% short canals	0	0.278	0.3	0.364	0.766	0.211	0.075	0.683	0.7647	0.774	0.2	0.583	0.268	0.664	0.903	0.333	0.566	0.0548	0.269	0.957	0.8	0.25	0.932	0.551	0.0795455	0.100559	0.192771
# Full-length canals (>=+3.9)	100	26	28	0	18	45	0	20	1	11	60	0	30	42	3	30	33	69	19	2	10	0	4	32	81	161	67
% full-length canals	1	0.722	0.7	0	0.234	0.789	0	0.317	0.0294	0.208	0.8	0	0.732	0.336	0.0968	0.667	0.434	0.945	0.731	0.04348	0.2	0	0.0678	0.41	0.92	0.899	0.807

## Sheet: Data-MillionMut,Suppressors
DD	gene/clone:	exc-15	H09G03.1	H09G03.1	exc-13	T19D12.9	C09F12.3		Suppressor	exc-5	suex-1;exc-5	suex-2;exc-5
Mutation	Mutation:	E89K	P15S	G67R	C44Y	Q61X	P41S		RNAi:		F12A10.7	C53B4.1
Strains:	Strain name:	VC20239	VC20363	VC20573	VC40373	VC40556	VC40788				II-4O02	IV-4H05
# Canals Observed		14	22	23	25	21	0			118	224	207
Average Length		3.75	3.92	3.86	3.91	3.9				1.35	2.34	2.32
Std.Dev.		0.259	0.235	0.303	0.237	0.201				0.459	0.743	0.786
# Short Canals		7	3	6	4	4	0			118	213	200
% Short Canals		0.5	0.136	0.261	0.16	0.19				1	0.951	0.966
Average Short-Canal Length		3.5	3.43	3.45	3.45	3.5				1.35	2.25	2.26
Std.Dev.Short-Canal Length		0.259	0.289	0.306	0.144	0.144				0.509	0.654	0.733
# Canals <=1.0 Length		0	0	0	0	0	0			50	9	14
# Canals 1.5-3.8 Length		7	3	6	4	4	0			68	204	186
# Full-length canals (>=+3.9)		7	19	17	21	17	0			0	11	7
	TOTAL # SHORT CANALS	7	3	6	4	4	-			118	213	200
	Total % short canals	0.5	0.14	0.26	0.16	0.19	-			1	0.95	0.97
									# canals length>2:	0	96	91
p-value (3x2 Fisher's exact test) for million mutation animals alone		5.52x10-6	5.22x10-3	2.37x10-5	1.04x10-2	7.04x10-4				vs. N2: 9.22x10-65	vs. exc-5: 6.21x10-16	vs. exc-5: 2.80x10-12
	Data - "Million	4	4	4	4	4			Data - exc-5	1	3	4
	Mutant" animals:	4	4	3.5	4	4			and suex kd:	1.5	4	3.5
		4	4	3.6	4	4				1	3	2
		4	4	4	3	3.5				1.5	0	2
		3.5	4	4	4	4				1.5	2	2
		3.5	3.5	4	4	4				1.5	2	1.5
		3.5	4	4	3.5	4				2	2	4
		3.5	4	4	4	4				0.5	2	3.5
		3.5	4	3.8	4	3.5				0.5	4	1.5
		4	4	3.8	4	4				0.5	1.5	1
		4	3.8	4	4	4				1.5	2	2.5
		4	3	4	4	4				1.5	4	3.5
		3.5	4	4	4	3.5				1.5	2.5	2.5
		3.5	4	4	4	4				2	2	1.5
			4	4	4	4				2	2	3
			4	4	4	4				1.5	2	3
			4	3	3.5	4				2	2.5	3
			4	4	4	3.5				1.5	2	3
			4	4	4	4				1	3	2
			4	3	4	4				1.5	2	1.5
			4	4	3.8	4				1	2	2.5
			4	4	4					2	1.5	1.5
				4	4					1.5	3.5	1.5
					4					1.5	2.5	3
					4					2	3	1
										1.5	3.5	2
										0.5	2.5	2
										0.5	2.5	2
										1	3	3.5
										1.5	3.5	2
										1.5	4	1.5
										2	2	3
										1	2	1.5
										1.5	2	3
										1	2	3
										1.5	2	3
										1	2	2
										1.5	2.5	2
										0.5	1.5	3
										2	2.5	4
										2	2	3.5
										1.5	2	1
										1	2.5	1.5
										0.5	4	3.5
										2	2.5	3.5
										1.5	3.5	1.5
										2	3.5	3
										2	4	3
										1.5	3.5	3
										1	4	3.5
										0.5	2.5	2
										1	2	2
										1	2	3.5
										0.5	2.5	2
										1.5	2	2
										2	1.5	2
										1	3.5	3.5
										1.5	1.5	2.5
										1	1.5	3
										1	2.5	3
										1	2	1.5
										1.5	2	3
										1.5	1	1
										1	2.5	2.5
										1	2	1.5
										1	1.5	2
										2	2.5	2
										2	3	0.5
										1.5	2	2.5
										1	2.5	1.5
										1.5	3.5	2
										2	3	1
										2	3.5	2
										2	3.5	2
										1	3	2.5
										1	2	3
										1	2	4
										1	1	3
										0.5	2	2
										1	3.5	3
										1.5	3	1
										1	2.5	2.5
										0.5	2	2
										1	3	3.5
										1.5	3.5	2.5
										2	3	1
										1	2.5	2
										1.5	2.5	2
										1	2	3
										1	2	3.5
										1.5	1.5	1.5
										1.5	1.5	2
										1.5	1	2
										2	2	2
										1	2.5	3
										1	2	2.5
										1.5	1.5	3.5
										2	2	2
										2	2	2.5
										2	3	3.5
										1	3.5	3.5
										1	3	2
										1	2.5	3
										1.5	3	2
										1	2	2
										1.5	3	2
										1	3	2.5
										1.5	2	3.75
										1.5	2	2
										1.5	2	2.5
										1	2	2
										1.5	1.5	2
										1	1.5	2
										2	1.5	2.5
										2	2	2
										2	2	2.5
										1.5	2	3
										1.5	4	2
											1	2.5
											1	2
											2	1.5
											2	1.5
											2	1.5
											2	2
											2	3.5
											3.75	2.5
											3.5	3.5
											1.5	3
											2	4
											2.5	4
											2	3.5
											2.5	1.5
											2.5	1.5
											2	2
											1.5	1.5
											2.5	1
											2.5	2
											3.5	2.5
											3	2.5
											2	1.5
											2	2
											1.5	1.5
											1.5	1.5
											3.5	3
											3	2.5
											2.5	3
											2	3
											2	3
											2	4
											2	2
											3	2.5
											4	2
											2	2
											2	2
											4	2
											3	2
											2	2
											2	2.5
											1.5	3.5
											1.5	2
											2.5	2
											2.5	1
											3	2
											1.5	2
											1.5	2.5
											2.5	2
											3.5	2
											1	2
											1.5	1.5
											1.5	2
											2.5	2.5
											2	2.5
											2	2
											3	2
											2.5	1.5
											4.1	1.5
											1	2
											1	0.5
											3.75	0.5
											3	2.5
											3.5	2.5
											2	3
											2	3
											1.5	3
											2.5	2
											2	1.5
											2	2
											2	2
											2	2
											2	3.5
											2	1.5
											2	3
											1.5	3.75
											3	2
											2	2.5
											2	3.5
											1.5	1.5
											2	2
											2	2
											2	3.5
											2	1
											2	2
											2	1
											3	1.5
											3	2
											3	2
											2	1.5
											2
											2
											2
											3
											2
											2
											2.5
											2.5
											3
											2
											1.5
											1.5
											2
											2
											2.5
											2.5
											1.5
